# Supplementary material
Source: PubMed Central journal article supplement (PMC5833499)
Supplement: jamainternmed-178-75-s001.pdf [file jamainternmed-178-75-s001.pdf]

## Supplementary Online Content

Ravi B, Pincus D, Wasserstein D, et al. Association of overlapping surgery with increased risk for complications following hip surgery: a population-based, matched cohort study. *JAMA Intern Med*. Published online December 4, 2017.  
doi:10.1001/jamainternmed.2017.6835

**eAppendix 1.** Predictors of hip fracture revision

**eTable 1.** Predictors of revision of hip fractures within 1 y of surgery

**eAppendix 2.** Adding type of assistant to the matched variables

**eTable 2.** Characteristics of hip fracture cohort after matching

**eTable 3.** Outcomes (hazards ratio) for postoperative complications in matched hip fracture patients

This supplementary material has been provided by the authors to give readers additional information about their work.

## eAppendix 1: Predictors of hip fracture revision

We performed a multivariate proportional hazards regression in hip fracture patients, after accounting for clustering by surgeon, for revision within a year of surgery.

**eTable 1:** Predictors of revision of hip fractures within 1 y of surgery

|                                | Revision         |         |
|--------------------------------|------------------|---------|
|                                | Adjusted HR      | p-value |
| <b>Concurrent procedure</b>    | 1.46 (1.06-2.00) | 0.019   |
| Age (y)                        | 0.96 (0.95-0.97) | <0.0001 |
| Male                           | 0.88 (0.79-0.98) | 0.018   |
| Income Quintile                |                  |         |
| Lowest                         | 0.93 (0.79-1.10) | 0.412   |
| 2                              | 0.98 (0.82-1.17) | 0.805   |
| 3                              | 0.93 (0.79-1.08) | 0.327   |
| 4                              | 1.13 (0.96-1.32) | 0.140   |
| Highest                        | REF              | REF     |
| Nursing Home                   | 0.62 (0.50-0.79) | <0.0001 |
| Previous myocardial infarction | 0.96 (0.78-1.18) | 0.680   |
| Congestive heart failure       | 0.99 (0.87-1.14) | 0.932   |
| Cerebrovascular Disease        |                  |         |
| COPD                           | 1.06 (0.93-1.20) | 0.399   |
| Dementia                       | 0.68 (0.58-0.79) | <0.0001 |
| Diabetes                       | 0.90 (0.80-1.00) | 0.047   |
| Chronic Renal Failure          | 0.97 (0.83-1.14) | 0.735   |
| Frail                          | 0.87 (0.75-1.01) | 0.063   |
| Charlson Score                 |                  |         |
| 0                              | REF              | REF     |
| 1                              | 0.95 (0.82-1.10) | 0.509   |
| 2                              | 1.00 (0.84-1.18) | 0.952   |
| 3 or more                      | 0.95 (0.81-1.12) | 0.546   |
| Hours from ED to surgery       | 1.01 (1.01-1.01) | <0.0001 |
| Teaching hospital              | 1.20 (0.89-1.61) | 0.230   |
| Surgical assistant             |                  |         |
| None                           | REF              | REF     |
| Family doctor                  | 1.69 (1.30-2.20) | <0.0001 |
| Non-orthopaedic surgeon        | 0.99 (0.72-1.34) | 0.925   |
| Orthopaedic surgeon            | 1.10 (0.85-1.41) | 0.474   |
| Years in practice              | 1.00 (0.99-1.00) | 0.265   |
| Surgeon volume                 | 0.99 (0.99-0.99) | 0.004   |
| Hospital volume                | 1.00 (1.00-1.00) | 0.662   |

## **eAppendix 2: Adding type of assistant to the matched variables**

We repeated the matching of overlapping and non-overlapping hip fracture procedures by patient age, patient sex, procedure, surgeon, hospital and type of assistant (eTable 2). All variables were balanced between groups, except for prior myocardial infarction that was slightly more prevalent in non-overlapping procedures (7.8% versus 5.3%, standardized difference of 11%).

We then determined the risk for a complication in the overlapping group, controlling for prior MI (eTable 3).

**eTable 2:** Characteristics of hip fracture cohort after matching

|                                          | Overlapping        | Non-overlapping        | Standardized Difference |
|------------------------------------------|--------------------|------------------------|-------------------------|
| <b>Number of patients</b>                | N=748              | N=748                  |                         |
| <b>Demographics</b>                      |                    |                        |                         |
| Age (y) [Median (IQR)]                   | 84 (78-89)         | 84 (78-89)             | 0.01                    |
| Female [N (%)]                           | 559 (74.7%)        | 559 (74.7%)            | 0                       |
| Income Quintile [N (%)]                  |                    |                        |                         |
| Lowest                                   | 164 (21.9%)        | 170 (22.7%)            | 0.02                    |
| 2                                        | 144 (19.3%)        | 150 (20.1%)            | 0.02                    |
| 3                                        | 131 (17.5%)        | 124 (16.6%)            | 0.02                    |
| 4                                        | 127 (17.0%)        | 134 (17.9%)            | 0.02                    |
| Highest                                  | 173 (23.1%)        | 161 (21.5%)            | 0.04                    |
| Nursing Home [N (%)]                     | 70 (9.4%)          | 78 (10.4%)             | 0.04                    |
| <b>Co-morbidities [N (%)]</b>            |                    |                        |                         |
| Previous myocardial infarction           | 40 (5.3%)          | 58 (7.8%)              | 0.11                    |
| Congestive heart failure                 | 178 (23.8%)        | 174 (23.3%)            | 0.01                    |
| Cerebrovascular Disease                  | 52 (7.0%)          | 60 (8.0%)              | 0.04                    |
| COPD                                     | 135 (18.0%)        | 131 (17.5%)            | 0.01                    |
| Dementia                                 | 238 (31.8%)        | 247 (33.0%)            | 0.03                    |
| Diabetes                                 | 226 (30.2%)        | 204 (27.3%)            | 0.07                    |
| Chronic Renal Failure                    | 88 (11.8%)         | 85 (11.4%)             | 0.01                    |
| Frail                                    | 129 (17.2%)        | 148 (19.8%)            | 0.07                    |
| Charlson Score                           |                    |                        |                         |
| No prior admission                       | 317 (42.4%)        | 323 (43.2%)            | 0.02                    |
| 0                                        | 133 (17.8%)        | 138 (18.4%)            | 0.02                    |
| 1                                        | 110 (14.7%)        | 104 (13.9%)            | 0.02                    |
| 2                                        | 81 (10.8%)         | 73 (9.8%)              | 0.04                    |
| 3 or more                                | 107 (14.3%)        | 110 (14.7%)            | 0.01                    |
| <b>Fracture characteristics</b>          |                    |                        |                         |
| Fracture type                            |                    |                        |                         |
| Femoral neck                             | 413 (55.2%)        | 406 (54.3%)            | 0.02                    |
| Intertrochanteric                        | 317 (42.4%)        | 318 (42.5%)            | 0                       |
| Subtrochanteric                          | 18 (2.4%)          | 24 (3.2%)              | 0.05                    |
| Fixation                                 |                    |                        |                         |
| Hemiarthroplasty                         | 344 (46.0%)        | 344 (46.0%)            | 0                       |
| Screw                                    | 310 (41.4%)        | 310 (41.4%)            | 0                       |
| Intramedullary Nail                      | 94 (12.6%)         | 94 (12.6%)             | 0                       |
| <b>Admission characteristics</b>         |                    |                        |                         |
| Hours from ED to OR [Median (IQR)]       | 36 (22-51)         | 36 (23-52)             | 0.02                    |
| Teaching hospital [N (%)]                | 517 (69.1%)        | 517 (69.1%)            | 0                       |
| Surgical assistant [N (%)]               |                    |                        |                         |
| Family doctor                            | 149 (19.9%)        | 149 (19.9%)            | 0                       |
| Non-orthopaedic surgeon                  | 14 (1.9%)          | 14 (1.9%)              | 0                       |
| Orthopaedic surgeon                      | 225 (30.1%)        | 225 (30.1%)            | 0                       |
| Years in practice [Median (IQR)]         | 0 (0-4)            | 0 (0-5)                | 0.01                    |
| Surgeon volume [Median (IQR)]            | 41 (29-58)         | 41 (29-56)             | 0.01                    |
| Hospital volume [Median (IQR)]           | 268 (193-338)      | 262 (195-341)          | 0.01                    |
|                                          | <b>Overlapping</b> | <b>Non-overlapping</b> | <b>p-value</b>          |
| Surgical complication                    | 71 (9.5%)          | 46 (6.1%)              | 0.011                   |
| Dislocation                              | n/a                | n/a                    | 0.71                    |
| Infection                                | 43 (5.7%)          | 31 (4.1%)              | 0.019                   |
| Revision                                 | 49 (6.6%)          | 27 (3.6%)              | 0.005                   |
| Duration of surgery (min) [Median (IQR)] | 116 (92-139)       | 109 (88-130)           | 0.002                   |
| Death within 90 days                     | 115 (15.4%)        | 90 (12.0%)             | 0.08                    |

**eTable 3:** Outcomes (hazards ratio) for postoperative complications in matched hip fracture patients

| <b>Hip fracture</b>    | <b>Hazard Ratio (95%CI)</b> | <b>p-value</b> |
|------------------------|-----------------------------|----------------|
| Composite complication | 1.83 (1.22-2.75)            | 0.004          |
| Dislocation            | 0.50 (0.09-2.73)            | 0.424          |
| Superficial infection  | 1.81 (1.08-3.05)            | 0.026          |
| Revision               | 2.34 (1.37-4.01)            | 0.002          |
|                        |                             |                |
